# Supplementary material for: The Gastrointestinal Microbiome: A Review
Source: PubMed Central journal article supplement — J Vet Intern Med. 2017 Nov 24;32(1):9–25. doi: 10.1111/jvim.14875 (PMC5787212; doi:10.1111/jvim.14875), 2017-11-24
Supplement: JVIM-32-9-s001.pdf [file JVIM-32-9-s001.pdf]

**Table 1:** Effects of diet and select prebiotics on fecal microbial communities in dogs.

| Diet                                                                                                                                                | Alterations in Fecal Microbiome                                                                                                                                                                                                                                                                                                                                                                                                                                                                                                                                                             | Source                |
|-----------------------------------------------------------------------------------------------------------------------------------------------------|---------------------------------------------------------------------------------------------------------------------------------------------------------------------------------------------------------------------------------------------------------------------------------------------------------------------------------------------------------------------------------------------------------------------------------------------------------------------------------------------------------------------------------------------------------------------------------------------|-----------------------|
| <i>HP (61% of protein; DMB) dry kibble diet v. HC (19% of protein; DMB) dry kibble diet v. dry kibble commercial (DC; 26% of protein; DMB) diet</i> | Sequence diversity was highest in dogs fed the DC diet. The abundances of <i>Clostridiales</i> , <i>Lactobacillales</i> , <i>Coriobacteriales</i> and <i>Bacteroidales</i> were increased in dogs fed the DC diet, while <i>Lactobacillales</i> and <i>Bacteroidales</i> were not detected in dogs fed the HP and HC diets. The HP and HC diets also decreased the abundances of members of the <i>Lachnospiraceae</i> family. The HC diet favored the growth of representatives of <i>Erysipelotrichales</i> , while the HP diet favored that of representatives of <i>Fusobacteriales</i> | Hang<br>2012          |
| Dry kibble diet with 0 v. 7.5% beet pulp                                                                                                            | The beet pulp diet decreased the abundances of <i>Fusobacteria</i> and <i>Actinobacteria</i> , but increased that of <i>Firmicutes</i> . The abundance of <i>Clostridia</i> was increased and complemented by a decline in that of <i>Erysipelotrichi</i> when dogs were switched to the beet pulp diet                                                                                                                                                                                                                                                                                     | Midde<br>Ibos<br>2008 |
| Dry kibble diet with 0 v. 7.5% beet pulp                                                                                                            | Control dogs had greater proportions of <i>Bacteroidetes</i> , <i>Fusobacteria</i> and <i>Proteobacteria</i> , whereas those fed the beet pulp diet had greater proportions of the <i>Bacteroidetes/Chlorobi</i> group and <i>Firmicutes</i> . The beet pulp diet did not greatly alter the gene sequence number of any KEGG functional categories                                                                                                                                                                                                                                          | Swans<br>on<br>2010   |
| Dry kibble diet                                                                                                                                     | No significant diet-induced differences were observed in                                                                                                                                                                                                                                                                                                                                                                                                                                                                                                                                    | Kerr                  |

|                                                                                                                                                                                         |                                                                                                                                                                                                                                                                                                                                                                                                                                                                                                            |                        |
|-----------------------------------------------------------------------------------------------------------------------------------------------------------------------------------------|------------------------------------------------------------------------------------------------------------------------------------------------------------------------------------------------------------------------------------------------------------------------------------------------------------------------------------------------------------------------------------------------------------------------------------------------------------------------------------------------------------|------------------------|
| with 0 v. 25%<br>cooked navy beans                                                                                                                                                      | the microbial populations                                                                                                                                                                                                                                                                                                                                                                                                                                                                                  | 2013                   |
| Six raw meat-based<br>diets: (1) beef<br>control; (2) beef +<br>1.4% inulin; (3)<br>beef + 1.4% YCW;<br>(4) chicken control;<br>(5) chicken + 1.4%<br>inulin; (6) chicken<br>+ 1.4% YCW | Beef-based diets increased the abundance of <i>Escherichia</i> ,<br>but decreased that of <i>Anaerobiospirillum</i> compared with<br>chicken-based diets. Inulin decreased the abundances of<br><i>Enterobacteriaceae</i> and <i>Megamonas</i> , but increased that<br>of <i>Lactobacillus</i> compared with the control. Inulin also<br>decreased the abundance of <i>Escherichia</i> compared with<br>YCW. YCW increased the abundance of <i>Bifidobacterium</i><br>compared with inulin and the control | Belosh<br>apka<br>2013 |
| Diets with potato<br>fiber contents of 0,<br>1.5, 3, 4.5, or 6%                                                                                                                         | Fecal proportions of Firmicutes increased while<br>Fusobacteria decreased with PF inclusion. PF inclusion<br>was also associated with an increased proportion of<br><i>Faecalibacterium</i> and increased concentrations of fecal<br>SCFA                                                                                                                                                                                                                                                                  | Panase<br>vich<br>2015 |
