# Supplementary material for: The Gastrointestinal Microbiome: A Review
Source: PubMed Central journal article supplement — J Vet Intern Med. 2017 Nov 24;32(1):9–25. doi: 10.1111/jvim.14875 (PMC5787212; doi:10.1111/jvim.14875), 2017-11-24
Supplement: JVIM-32-9-s002.pdf [file JVIM-32-9-s002.pdf]

**Table 2:** Effects of diet and select prebiotics on fecal microbial communities in cats

| Diet                                                                                                                                                | Alterations in Fecal Microbiome                                                                                                                                                                                                                                                                                                                                                                                                 | Source          |
|-----------------------------------------------------------------------------------------------------------------------------------------------------|---------------------------------------------------------------------------------------------------------------------------------------------------------------------------------------------------------------------------------------------------------------------------------------------------------------------------------------------------------------------------------------------------------------------------------|-----------------|
| Dry (33 % protein, 11 % fat and 46 % carbohydrate; DMB) v. wet (42 % protein, 42 % fat and 5 % carbohydrate; DMB) diets                             | The dry diet increased the abundance of Actinobacteria and decreased those of Fusobacteria and Proteobacteria compared with the wet diet. The dry diet increased the abundances of <i>Lactobacillus</i> , <i>Megasphaera</i> and <i>Olsenella</i> and decreased that of <i>Bacteroides</i> and <i>Blautia</i>                                                                                                                   | Birmingham 2013 |
| HPLC (53 % protein, 24 % fat and 31 % carbohydrate; DMB) dry kibble diet v. MPMC (34 % protein, 9 % fat and 11 % carbohydrate; DMB) dry kibble diet | The abundance of Actinobacteria was increased and that of Fusobacteria was decreased in the MPMC group. The abundances of <i>Clostridium</i> , <i>Faecalibacterium</i> , <i>Ruminococcus</i> , <i>Blautia</i> and <i>Eubacterium</i> were higher in the HPLC group, while those of <i>Dialister</i> , <i>Acidaminococcus</i> , <i>Bifidobacterium</i> , <i>Megasphaera</i> and <i>Mitsuokella</i> were higher in the MPMC group | Hooda 2013      |
| HPLC (53 % protein, 24 % fat and 31 % carbohydrate; DMB) dry kibble diet v. MPMC (34 % protein, 9 % fat and 11 %                                    | The abundances of Firmicutes and Actinobacteria were lower, but those of Fusobacteria and Proteobacteria were higher in the HPLC group. <i>Fusobacterium</i> , <i>Clostridium</i> , <i>Eubacterium</i> , <i>Ruminococcus</i> , <i>Bacteroides</i> and <i>Desulfovibrio</i> were more abundant in the HPLC                                                                                                                       | Deusch 2014     |

---

|                    |                                                                     |  |
|--------------------|---------------------------------------------------------------------|--|
| carbohydrate; DMB) | group. <i>Megasphaera</i> , <i>Bifidobacterium</i> ,                |  |
| dry kibble diets   | <i>Acidaminococcus</i> , <i>Selenomonas</i> , and <i>Prevotella</i> |  |
|                    | were more abundant in the MPMC group.                               |  |
|                    | Pathways related to amino acid biosynthesis                         |  |
|                    | and metabolism exhibited strongest diet-related                     |  |
|                    | differences                                                         |  |

---

|                          |                                               |            |
|--------------------------|-----------------------------------------------|------------|
| High-                    | Increased abundances of Firmicutes and        | Birmingham |
| protein:fat:carbohydrate | Actinobacteria and a decreased abundance of   | 2013       |
| wet diet (45:37:2 %      | Fusobacteria were observed in kittens fed the |            |
| DM) v. moderate          | dry diet compared with those fed the wet diet |            |
| protein:fat:carbohydrate | after weaning                                 |            |
| dry diet (35:20:28 %;    |                                               |            |
| DMB)                     |                                               |            |

---
