# Supplementary material for: The Gastrointestinal Microbiome: A Review
Source: PubMed Central journal article supplement — J Vet Intern Med. 2017 Nov 24;32(1):9–25. doi: 10.1111/jvim.14875 (PMC5787212; doi:10.1111/jvim.14875), 2017-11-24
Supplement: JVIM-32-9-s003.pdf [file JVIM-32-9-s003.pdf]

**Table 3:** Disease states associated with alterations in gut microflora in dogs

| <b>Disease State</b>                        | <b>Alterations in Fecal Microbiome</b>                                                                                                                                                                                                                                                                                                      | <b>Source</b>       |
|---------------------------------------------|---------------------------------------------------------------------------------------------------------------------------------------------------------------------------------------------------------------------------------------------------------------------------------------------------------------------------------------------|---------------------|
| <i>Chronic enteropathy of unknown cause</i> | Higher abundance of <i>Lactobacillales</i> , <i>Actinobacteria</i> , and <i>Erysipelotrichales</i> in the duodenum                                                                                                                                                                                                                          | Allenspach<br>2010  |
| Diarrhea, undetermined cause                | Lower abundance of <i>Bacteroidetes</i> , notably <i>Bacteroides vulgaris</i> in the feces                                                                                                                                                                                                                                                  | Chaban<br>2012      |
| Acute hemorrhagic diarrhea                  | Lower fecal abundances of <i>Blautia</i> and <i>Rumonococcaceae</i> but higher abundances of <i>Sutterella</i> and <i>Clostridium perfringens</i> in dogs with hemorrhagic diarrhea. Higher fecal abundance of <i>Clostridium</i> in dogs with non-hemorrhagic diarrhea. Reduction in relative proportion of species known to produce SCFAs | Suchodolski<br>2012 |
| IBD                                         | Lower species richness and lower abundance of <i>Bacteroidetes</i> but higher abundances of <i>Enterobacteriaceae</i> and <i>Clostridiaceae</i> in the duodenum                                                                                                                                                                             | Xenoulis<br>2008    |
| IBD                                         | Higher abundance of <i>Proteobacteria</i> and lower abundance of <i>Clostridia</i> in the duodenum. Higher counts of <i>Pseudomonas</i> , <i>Acinetobacter</i> , <i>Conchifomibious</i> , <i>Achromobacter</i> , <i>Brucella</i> , and <i>Brevundimonas</i> in the                                                                          | Suchodolski<br>2010 |

|                                   |                                                                                                                                                                                                                                                                                                                            |                         |
|-----------------------------------|----------------------------------------------------------------------------------------------------------------------------------------------------------------------------------------------------------------------------------------------------------------------------------------------------------------------------|-------------------------|
|                                   | duodenum                                                                                                                                                                                                                                                                                                                   |                         |
| IBD                               | Lower abundance of <i>Fusobacteria</i> , <i>Bacteroidaceae</i> , <i>Prevotellaceae</i> , and <i>Clostridiales</i> in the duodenum. Lower counts of <i>Firmicutes</i> and <i>Bacteroidetes</i> and higher counts of specific genera of <i>Proteobacteriaceae</i> , including <i>Diaphorobacter</i> and <i>Acinetobacter</i> | Suchodolski 2012        |
| Obesity                           | No significant changes in microbial diversity or composition associated with obesity. Beagles fed ad lib had increased <i>Clostridiales</i> and whereas dogs fed a calorie-restricted diet had decreased fecal <i>Gammaproteobacteria</i> and <i>Alphaproteobacteria</i>                                                   | Handl 2013              |
| Exocrine pancreatic insufficiency | High abundance of <i>C. perfringens</i> on culture of duodenal juice, associated with marked reductions in mucosal brush border enzyme activities.                                                                                                                                                                         | Williams, <i>et al.</i> |
